# Supplementary material for: Cost and Affordability of Healthy, Equitable and Sustainable Diets in Low Socioeconomic Groups in Australia
Source: MDPI journal article supplement (doi:10.3390/nu13082900), 2021-08-23
Supplement: s1 [file s1]

Supplementary Table S3: Calculations for minimum wage and welfare only household incomes for 2019.

| Household                                                                | Household A – adult male, adult female, teen boy, child |                                       | Household B - adult female, teen boy, child |                                       | Household C – Senior male, senior female |
|--------------------------------------------------------------------------|---------------------------------------------------------|---------------------------------------|---------------------------------------------|---------------------------------------|------------------------------------------|
| Income source                                                            | Minimum wage                                            | Welfare only                          | Minimum wage                                | Welfare only                          | Welfare only                             |
| Paid employment - adult male                                             | \$1481.24                                               | n/a                                   | n/a                                         | n/a                                   | n/a                                      |
| Paid employment - adult female                                           | \$233.88                                                | n/a                                   | \$877.13                                    | n/a                                   | n/a                                      |
| Unemployment Allowance – adult male                                      | n/a                                                     | \$504.70                              | n/a                                         | n/a                                   | n/a                                      |
| Unemployment Allowance – adult female                                    | n/a                                                     | \$504.70                              | \$302.80                                    | \$604.70                              | n/a                                      |
| Family Tax Benefit A fortnightly payment                                 | \$428.40                                                | \$428.40                              | \$428.40                                    | \$428.40                              | n/a                                      |
| Family Tax Benefit A annual supplement                                   | \$57.84 (\$751.90 per child per year)                   | \$57.84 (\$751.90 per child per year) | \$57.84 (\$751.90 per child per year)       | \$57.84 (\$751.90 per child per year) | n/a                                      |
| Family Tax Benefit B fortnightly payment                                 | \$107.66                                                | \$52.08                               | \$110.60                                    | \$110.60                              | n/a                                      |
| Family Tax Benefit B annual supplement                                   | \$14.04 (\$365 per family per year)                     | \$14.04 (\$365 per family per year)   | \$14.04 (\$365 per family per year)         | \$14.04 (\$365 per family per year)   | n/a                                      |
| Age Pension fortnightly payment                                          | n/a                                                     | n/a                                   | n/a                                         | n/a                                   | \$1271.80                                |
| Age Pension Fortnightly Supplement                                       | n/a                                                     | n/a                                   | n/a                                         | n/a                                   | \$103.20                                 |
| Total Clean Energy Supplement                                            | -                                                       | \$15.80                               | \$9.50                                      | \$9.50                                | \$21.20                                  |
| Rent Assistance                                                          | \$161.14                                                | \$162.12                              | \$161.14                                    | \$162.12                              | \$129.20                                 |
| Income tax payable (including tax offsets & Medicare levy if applicable) | -\$125.87                                               | n/a                                   | -\$64.26                                    | n/a                                   | n/a                                      |
| <b>FORTNIGHTLY INCOME TOTAL</b>                                          | <b>\$2358.33</b>                                        | <b>\$1739.68</b>                      | <b>\$1897.18</b>                            | <b>\$1387.20</b>                      | <b>\$1525.40</b>                         |
