# Supplementary material for: Cost and Affordability of Healthy, Equitable and Sustainable Diets in Low Socioeconomic Groups in Australia
Source: MDPI journal article supplement (doi:10.3390/nu13082900), 2021-08-23
Supplement: s1 [file s1]

Supplementary Table S1: Participant numbers in subcategories in the ABS National Nutrition and Physical Activity Survey

|                          | <b>All<br/>Income<br/>levels</b> | <b>Lowest<br/>Income<br/>Quintile</b> |
|--------------------------|----------------------------------|---------------------------------------|
| <b>Male 31-50, (n)</b>   | 1669                             | 151                                   |
| <b>Female 31-50, (n)</b> | 1896                             | 258                                   |
| <b>Male 71+, (n)</b>     | 533                              | 215                                   |
| <b>Female 71+, (n)</b>   | 745                              | 338                                   |
| <b>Boy 14, (n)</b>       | 72                               | 10                                    |
| <b>Boy 14-18, (n)</b>    | 403                              | 49                                    |
| <b>Girl 8, (n)</b>       | 67                               | 9                                     |
| <b>Child 4-8, (n)</b>    | 789                              | 120                                   |
