# Supplementary material for: Cost and Affordability of Healthy, Equitable and Sustainable Diets in Low Socioeconomic Groups in Australia
Source: MDPI journal article supplement (doi:10.3390/nu13082900), 2021-08-23
Supplement: s1 [file s1]

Supplementary Table S4A: Composition of original Healthy Diets ASAP habitual diet pricing tool for mean Australian population and, Low SEG Healthy Diets ASAP habitual diet pricing tool, and recommended diet pricing tool, for Household B (one adult, two children)

| Food item                                     | Habitual Diet (g/fortnight) |                               | Recommended Diet (g/fortnight)<br>Original Healthy Diets ASAP |
|-----------------------------------------------|-----------------------------|-------------------------------|---------------------------------------------------------------|
|                                               | Original Healthy Diets ASAP | Low SEG Healthy Diets ASAP    |                                                               |
| Energy (kJ/day)                               | 23,890 kJ                   | 23,424 kJ                     | 23,658 kJ                                                     |
| Water                                         |                             |                               |                                                               |
| Water, bottled (mL)                           | 3275                        | 2273 (31% less than Original) | 3275                                                          |
| Fruit                                         |                             |                               |                                                               |
| Apples (g)                                    | 2774                        | 2808                          | 4060                                                          |
| Bananas (g)                                   | 606                         | 614                           | 4060                                                          |
| Oranges (g)                                   | 1304                        | 560                           | 4060                                                          |
| Fruit salad, canned in juice (g)              | 1425                        | 1089                          | 0                                                             |
| Total Fruit (g)                               | 8476                        | 7298 (14% less than Original) | 12180                                                         |
| Vegetables and Legumes                        |                             |                               |                                                               |
| Potato, loose (g)                             | 944                         | 955                           | 1620                                                          |
| Broccoli, loose (g)                           | 277                         | 209                           | 1120                                                          |
| White cabbage, loose (g)                      | 141                         | 137                           | 1120                                                          |
| Iceberg lettuce, whole (g)                    | 468                         | 378                           | 1120                                                          |
| Carrot, loose (g)                             | 583                         | 485                           | 1680                                                          |
| Pumpkin (g)                                   | 154                         | 289                           | 1680                                                          |
| Onion, loose (g)                              | 37                          | 82                            | 1218                                                          |
| Tomatoes, loose (g)                           | 301                         | 397                           | 1218                                                          |
| Sweetcorn, canned (g)                         | 130                         | 179                           | 810                                                           |
| Four bean mix, canned (g)                     | 50                          | 42                            | 480                                                           |
| Diced tomatoes, canned (g)                    | 141                         | 110                           | 1218                                                          |
| Baked Beans, canned (g)                       | 241                         | 96                            | 480                                                           |
| Frozen mixed vegetables (g)                   | 760                         | 482                           | 1218                                                          |
| Frozen peas (g)                               | 167                         | 128                           | 1218                                                          |
| Total Vegetables and Legumes (g)              | 4884                        | 4269 (13% less than Original) | 16200                                                         |
| Grain (Cereal) Foods – Wholegrain and Refined |                             |                               |                                                               |
| Wholemeal bread, pre-packaged (g)             | 683                         | 607                           | 3152                                                          |
| White bread, pre-packaged (g)                 | 2344                        | 2177                          | 669                                                           |
| Rolled oats (g)                               | 615                         | 559                           | 4968                                                          |
| Breakfast cereal, corn flakes (g)             | 525                         | 289                           | 502                                                           |
| Breakfast cereal, wheat biscuits (g)          | 263                         | 160                           | 1656                                                          |
| White pasta (g)                               | 942                         | 580                           | 1499                                                          |
| White rice (g)                                | 1098                        | 1248                          | 1499                                                          |

| Food item                                                            | Habitual Diet (g/fortnight) |                               | Recommended Diet (g/fortnight)<br>Original Healthy Diets ASAP |
|----------------------------------------------------------------------|-----------------------------|-------------------------------|---------------------------------------------------------------|
|                                                                      | Original Healthy Diets ASAP | Low SEG Healthy Diets ASAP    |                                                               |
| Dry wheat crackers, water crackers (g)                               | 225                         | 70                            | 585                                                           |
| Total Grain (Cereal) Foods (g)                                       | 6753                        | 5837 (14% less than Original) | 14530                                                         |
| Lean Meats and Poultry, Fish, Eggs, Nuts and Seeds                   |                             |                               |                                                               |
| Tuna, canned in oil (g)                                              | 756                         | 553                           | 1374                                                          |
| Beef mince, lean (g)                                                 | 157                         | 78                            | 865                                                           |
| Lamb loin chops (g)                                                  | 83                          | 113                           | 866                                                           |
| Beef rump steak (g)                                                  | 683                         | 692                           | 868                                                           |
| Eggs (g)                                                             | 565                         | 524                           | 1648                                                          |
| Chicken, cooked whole (g)                                            | 1004                        | 829                           | 1098                                                          |
| Peanuts, roasted, unsalted (g)                                       | 0                           | 0                             | 360                                                           |
| Total Lean Meats and Poultry, Fish, Eggs, Nuts and Seeds (g)         | 3738                        | 3089 (17% less than Original) | 7079                                                          |
| Milk, Yoghurt, Cheese and Alternatives                               |                             |                               |                                                               |
| Cheddar cheese, full fat (g)                                         | 467                         | 509                           | 544                                                           |
| Cheddar cheese, reduced fat (g)                                      | 29                          | 39                            | 396                                                           |
| Milk, full fat (mL)                                                  | 4702                        | 5328                          | 4938                                                          |
| Milk, reduced fat (mL)                                               | 2102                        | 1301                          | 9000                                                          |
| Flavoured milk (mL)                                                  | 1529                        | 1375                          | 0                                                             |
| Yoghurt, full fat, plain (g)                                         | 127                         | 69                            | 1976                                                          |
| Yoghurt, flavoured reduced fat (g)                                   | 467                         | 597                           | 3900                                                          |
| Total Milk, Yoghurt, Cheese and Alternatives (g)                     | 9423                        | 9218 (2% less than Original)  | 20754                                                         |
| Unsaturated Oils and Spreads (or foods from which these are derived) |                             |                               |                                                               |
| Sunflower oil (mL)                                                   | 4                           | 7                             | 160                                                           |
| Olive oil (mL)                                                       | 4                           | 7                             | 160                                                           |
| Canola margarine (g)                                                 | 127                         | 149                           | 226                                                           |
| Total Unsaturated Oils and Spreads (g)                               | 135                         | 163 (21% more than Original)  | 546                                                           |
| Discretionary Choices – other                                        |                             |                               |                                                               |
| Chicken soup, canned (g)                                             | 715                         | 876                           | 0                                                             |
| Muffin, commercial (g)                                               | 1104                        | 666                           | 0                                                             |
| Instant noodles, wheat based (g)                                     | 301                         | 196                           | 0                                                             |
| White sugar (g)                                                      | 373                         | 430                           | 0                                                             |
| Cream-filled sweet biscuit, pre-packaged (g)                         | 359                         | 441                           | 0                                                             |
| Muesli bar, pre-packaged (g)                                         | 301                         | 315                           | 0                                                             |
| Savoury flavoured crackers (g)                                       | 182                         | 199                           | 0                                                             |
| Nuts, mixed, salted (g)                                              | 154                         | 197                           | 0                                                             |
| Confectionary (g)                                                    | 373                         | 365                           | 0                                                             |
| Chocolate (g)                                                        | 333                         | 280                           | 0                                                             |
| Potato crisps, pre-packaged (g)                                      | 420                         | 608                           | 0                                                             |
| Salad dressing (g)                                                   | 187                         | 161                           | 0                                                             |

| Food item                                               | Habitual Diet (g/fortnight) |                                | Recommended Diet (g/fortnight)<br>Original Healthy Diets ASAP |
|---------------------------------------------------------|-----------------------------|--------------------------------|---------------------------------------------------------------|
|                                                         | Original Healthy Diets ASAP | Low SEG Healthy Diets ASAP     |                                                               |
| Tomato sauce (g)                                        | 397                         | 375                            | 0                                                             |
| Beef sausages (g)                                       | 701                         | 670                            | 0                                                             |
| Butter (g)                                              | 224                         | 109                            | 0                                                             |
| Ham (g)                                                 | 129                         | 110                            | 0                                                             |
| Frozen lasagne, pre-packaged (g)                        | 3298                        | 2828                           | 0                                                             |
| Fish fillet crumbed, pre-packaged (g)                   | 182                         | 247                            | 0                                                             |
| Ice cream (g)                                           | 1561                        | 1077                           | 0                                                             |
| Total Discretionary Choices – other (g)                 | 13661                       | 12377 (9% less than Original)  | 0                                                             |
| <b>Alcoholic Drinks</b>                                 |                             |                                |                                                               |
| Beer, full strength (mL)                                | 428                         | 545                            | 0                                                             |
| White wine, sparkling (mL)                              | 572                         | 433                            | 0                                                             |
| Whisky (mL)                                             | 97                          | 371                            | 0                                                             |
| Red wine (mL)                                           | 491                         | 218                            | 0                                                             |
| Total Alcoholic Drinks (mL)                             | 1588                        | 1567 (1% less than Original)   | 0                                                             |
| <b>Takeaway foods</b>                                   |                             |                                |                                                               |
| Pizza, commercial (g)                                   | 872                         | 1546                           | 0                                                             |
| Meat pie, commercial (g)                                | 1194                        | 1099                           | 0                                                             |
| Hamburger, commercial (g)                               | 1749                        | 1896                           | 0                                                             |
| Potato chips, commercial (g)                            | 446                         | 631                            | 0                                                             |
| Total Takeaway foods (g)                                | 4261                        | 5172 (21% more than Original)  | 0                                                             |
| <b>Sugar sweetened drinks</b>                           |                             |                                |                                                               |
| Sugar-sweetened soft drink (mL)                         | 8612                        | 13598 (58% more than Original) | 0                                                             |
| <b>Artificially sweetened drinks</b>                    |                             |                                |                                                               |
| Artificially sweetened soft drink (mL)                  | 1419                        | 561 (60% less than Original)   | 0                                                             |
| <b>Items allocated to more than one food group</b>      |                             |                                |                                                               |
| Sandwich, pre-made, white bread, chicken and salad* (g) | 175                         | 442                            | 360                                                           |
| Canned meat and vegetable casserole** (g)               | 864                         | 305                            | 0                                                             |
| Orange fruit juice*** (mL)                              | 4734                        | 4453                           | 0                                                             |

\*Divided equally between Grains etc, Lean meats etc, and Vegetables

\*\*Divided equally between Lean meats etc and Vegetables

\*\*\*Divided equally between Fruit and Discretionary choices - other

Supplementary Table S4B: Composition of original Healthy Diets ASAP habitual diet pricing tool for mean Australian population and Low SEG Healthy Diets ASAP habitual diet pricing tool, and recommended diet pricing tool for Household C (older retired couple)

| Food item                                     | Habitual Diet (g/fortnight) |                              | Recommended Diet (g/fortnight)<br>Original Healthy Diets ASAP |
|-----------------------------------------------|-----------------------------|------------------------------|---------------------------------------------------------------|
|                                               | Original Healthy Diets ASAP | Low SEG Healthy Diets ASAP   |                                                               |
| Energy (kJ/day)                               | 14,536 kJ                   | 14,329 kJ                    | 15,095 kJ                                                     |
| Water                                         |                             |                              |                                                               |
| Water, bottled (mL)                           | 923                         | 471 (49% less than Original) | 923                                                           |
| Fruit                                         |                             |                              |                                                               |
| Apples (g)                                    | 1271                        | 1027                         | 2800                                                          |
| Bananas (g)                                   | 743                         | 680                          | 2800                                                          |
| Oranges (g)                                   | 791                         | 645                          | 2800                                                          |
| Fruit salad, canned in juice (g)              | 2017                        | 1980                         | 0                                                             |
| Total Fruit (g)                               | 5774                        | 5305 (8% less then Original) | 8400                                                          |
| Vegetables and Legumes                        |                             |                              |                                                               |
| Potato, loose (g)                             | 1304                        | 1280                         | 800                                                           |
| Broccoli, loose (g)                           | 249                         | 267                          | 700                                                           |
| White cabbage, loose (g)                      | 174                         | 125                          | 700                                                           |
| Iceberg lettuce, whole (g)                    | 418                         | 353                          | 700                                                           |
| Carrot, loose (g)                             | 493                         | 442                          | 1050                                                          |
| Pumpkin (g)                                   | 287                         | 287                          | 1050                                                          |
| Onion, loose (g)                              | 128                         | 141                          | 840                                                           |
| Tomatoes, loose (g)                           | 423                         | 461                          | 840                                                           |
| Sweetcorn, canned (g)                         | 161                         | 151                          | 400                                                           |
| Four bean mix, canned (g)                     | 36                          | 13                           | 375                                                           |
| Diced tomatoes, canned (g)                    | 89                          | 98                           | 840                                                           |
| Baked Beans, canned (g)                       | 243                         | 129                          | 375                                                           |
| Frozen mixed vegetables (g)                   | 656                         | 686                          | 840                                                           |
| Frozen peas (g)                               | 234                         | 232                          | 840                                                           |
| Total Vegetables and Legumes (g)              | 5234                        | 5013 (4% less than Original) | 10350                                                         |
| Grain (Cereal) Foods – Wholegrain and Refined |                             |                              |                                                               |
| Wholemeal bread, pre-packaged (g)             | 1055                        | 1057                         | 1280                                                          |
| White bread, pre-packaged (g)                 | 1093                        | 1267                         | 256                                                           |
| Rolled oats (g)                               | 931                         | 1169                         | 2160                                                          |
| Breakfast cereal, corn flakes (g)             | 331                         | 307                          | 192                                                           |
| Breakfast cereal, wheat biscuits (g)          | 285                         | 201                          | 720                                                           |
| White pasta (g)                               | 351                         | 410                          | 480                                                           |
| White rice (g)                                | 335                         | 425                          | 480                                                           |

| Food item                                                            | Habitual Diet (g/fortnight) |                               | Recommended Diet (g/fortnight)<br>Original Healthy Diets ASAP |
|----------------------------------------------------------------------|-----------------------------|-------------------------------|---------------------------------------------------------------|
|                                                                      | Original Healthy Diets ASAP | Low SEG Healthy Diets ASAP    |                                                               |
| Dry wheat crackers, water crackers (g)                               | 62                          | 60                            | 224                                                           |
| Total Grain (Cereal) Foods (g)                                       | 4471                        | 4925 (10% more than Original) | 5792                                                          |
| Lean Meats and Poultry, Fish, Eggs, Nuts and Seeds                   |                             |                               |                                                               |
| Tuna, canned in oil (g)                                              | 542                         | 494                           | 934                                                           |
| Beef mince, lean (g)                                                 | 173                         | 134                           | 433                                                           |
| Lamb loin chops (g)                                                  | 262                         | 254                           | 433                                                           |
| Beef rump steak (g)                                                  | 547                         | 443                           | 434                                                           |
| Eggs (g)                                                             | 515                         | 491                           | 1120                                                          |
| Chicken, cooked whole (g)                                            | 801                         | 818                           | 746                                                           |
| Peanuts, roasted, unsalted (g)                                       | 0                           | 0                             | 420                                                           |
| Total Lean Meats and Poultry, Fish, Eggs, Nuts and Seeds (g)         | 3179                        | 2982 (6% less than Original)  | 4520                                                          |
| Milk, Yoghurt, Cheese and Alternatives                               |                             |                               |                                                               |
| Cheddar cheese, full fat (g)                                         | 250                         | 261                           | 520                                                           |
| Cheddar cheese, reduced fat (g)                                      | 25                          | 26                            | 363                                                           |
| Milk, full fat (mL)                                                  | 2027                        | 1976                          | 4532                                                          |
| Milk, reduced fat (mL)                                               | 2427                        | 2071                          | 9126                                                          |
| Flavoured milk (mL)                                                  | 597                         | 482                           | 0                                                             |
| Yoghurt, full fat, plain (g)                                         | 109                         | 114                           | 1813                                                          |
| Yoghurt, flavoured reduced fat (g)                                   | 373                         | 350                           | 3650                                                          |
| Total Milk, Yoghurt, Cheese and Alternatives (g)                     | 5808                        | 5280 (9% less than Original)  | 20004                                                         |
| Unsaturated Oils and Spreads (or foods from which these are derived) |                             |                               |                                                               |
| Sunflower oil (mL)                                                   | 5                           | 3                             | 132                                                           |
| Olive oil (mL)                                                       | 5                           | 3                             | 132                                                           |
| Canola margarine (g)                                                 | 135                         | 140                           | 186                                                           |
| Total Unsaturated Oils and Spreads (g)                               | 145                         | 146 (1% more than Original)   | 450                                                           |
| Discretionary Choices – other                                        |                             |                               |                                                               |
| Chicken soup, canned (g)                                             | 1789                        | 1794                          | 0                                                             |
| Muffin, commercial (g)                                               | 793                         | 741                           | 0                                                             |
| Instant noodles, wheat based (g)                                     | 65                          | 90                            | 0                                                             |
| White sugar (g)                                                      | 491                         | 604                           | 0                                                             |
| Cream-filled sweet biscuit, pre-packaged (g)                         | 410                         | 393                           | 0                                                             |
| Muesli bar, pre-packaged (g)                                         | 46                          | 40                            | 0                                                             |
| Savoury flavoured crackers (g)                                       | 58                          | 47                            | 0                                                             |
| Nuts, mixed, salted (g)                                              | 129                         | 127                           | 0                                                             |
| Confectionary (g)                                                    | 123                         | 124                           | 0                                                             |
| Chocolate (g)                                                        | 109                         | 126                           | 0                                                             |
| Potato crisps, pre-packaged (g)                                      | 52                          | 68                            | 0                                                             |
| Salad dressing (g)                                                   | 101                         | 71                            | 0                                                             |

| Food item                                               | Habitual Diet (g/fortnight) |                              | Recommended Diet (g/fortnight)<br>Original Healthy Diets ASAP |
|---------------------------------------------------------|-----------------------------|------------------------------|---------------------------------------------------------------|
|                                                         | Original Healthy Diets ASAP | Low SEG Healthy Diets ASAP   |                                                               |
| Tomato sauce (g)                                        | 216                         | 232                          | 0                                                             |
| Beef sausages (g)                                       | 545                         | 521                          | 0                                                             |
| Butter (g)                                              | 188                         | 157                          | 0                                                             |
| Ham (g)                                                 | 103                         | 89                           | 0                                                             |
| Frozen lasagne, pre-packaged (g)                        | 787                         | 875                          | 0                                                             |
| Fish fillet crumbed, pre-packaged (g)                   | 252                         | 264                          | 0                                                             |
| Ice cream (g)                                           | 825                         | 852                          | 0                                                             |
| Total Discretionary – other (g)                         | 8034                        | 8188 (2% more than Original) | 0                                                             |
| <b>Alcoholic Drinks</b>                                 |                             |                              |                                                               |
| Beer, full strength (mL)                                | 2262                        | 2314                         | 0                                                             |
| White wine, sparkling (mL)                              | 907                         | 780                          | 0                                                             |
| Whisky (mL)                                             | 166                         | 200                          | 0                                                             |
| Red wine (mL)                                           | 968                         | 674                          | 0                                                             |
| Total Alcoholic Drinks (mL)                             | 4303                        | 3968 (8% less than Original) | 0                                                             |
| <b>Takeaway foods</b>                                   |                             |                              |                                                               |
| Pizza, commercial (g)                                   | 169                         | 71                           | 0                                                             |
| Meat pie, commercial (g)                                | 439                         | 464                          | 0                                                             |
| Hamburger, commercial (g)                               | 352                         | 434                          | 0                                                             |
| Potato chips, commercial (g)                            | 134                         | 184                          | 0                                                             |
| Total Takeaway foods (g)                                | 1094                        | 1153 (5% more than Original) | 0                                                             |
| <b>Sugar sweetened drinks</b>                           |                             |                              |                                                               |
| Sugar-sweetened soft drink (mL)                         | 1535                        | 1501 (2% less than Original) | 0                                                             |
| <b>Artificially sweetened drinks</b>                    |                             |                              |                                                               |
| Artificially sweetened soft drink (mL)                  | 523                         | 382 (27% less than Original) | 0                                                             |
| <b>Items allocated to more than one food group</b>      |                             |                              |                                                               |
| Sandwich, pre-made, white bread, chicken and salad* (g) | 84                          | 86                           | 320                                                           |
| Canned meat and vegetable casserole** (g)               | 623                         | 639                          | 0                                                             |
| Orange fruit juice*** (mL)                              | 1903                        | 1945                         | 0                                                             |

\*Divided equally between Grains etc, Lean meats etc, and Vegetables

\*\*Divided equally between Lean meats etc and Vegetables

\*\*\*Divided equally between Fruit and Discretionary choices - other
