# Supplementary material for: Cost and Affordability of Healthy, Equitable and Sustainable Diets in Low Socioeconomic Groups in Australia
Source: MDPI journal article supplement (doi:10.3390/nu13082900), 2021-08-23
Supplement: s1 [file s1]

Supplementary Table S5: Assumptions and resultant incomes for minimum wage and welfare only incomes for reference Households A, B and C in 2019

| Household                | Household A:<br>Adult male (31-50y), Adult female (31-50y),<br>teenage boy (14-18y), girl (4-8y)                                                                                                                                                                                                                                                                                                               | Household B:<br>Adult female (31-50y), teenage boy (14-18y),<br>girl (4-8y)                                                                                                                                                                                                                                                                                                                                                | Household C:<br>Senior male (71+y), Senior female (71+y)                                                                                                                                                                                                             |
|--------------------------|----------------------------------------------------------------------------------------------------------------------------------------------------------------------------------------------------------------------------------------------------------------------------------------------------------------------------------------------------------------------------------------------------------------|----------------------------------------------------------------------------------------------------------------------------------------------------------------------------------------------------------------------------------------------------------------------------------------------------------------------------------------------------------------------------------------------------------------------------|----------------------------------------------------------------------------------------------------------------------------------------------------------------------------------------------------------------------------------------------------------------------|
| Minimum wage assumptions | <ul style="list-style-type: none"> <li>• Adult male works on a permanent basis at national minimum wage for 38 hours a week (\$19.49/hr)</li> <li>• Adult female works on a part-time basis at national minimum wage (\$19.49/hr) for 6 hours a week</li> <li>• Both children attend school</li> <li>• None of the family are disabled</li> <li>• No savings or investments</li> <li>• Private rent</li> </ul> | <ul style="list-style-type: none"> <li>• Adult female works on a casual basis at national minimum wage (\$23.39/hr(\$19.49/hr + 15% casual loading)) for 25 hours a week for 39 weeks per year (not during school holidays)</li> <li>• No child support received</li> <li>• Both children attend school</li> <li>• None of the family are disabled</li> <li>• No savings or investments</li> <li>• Private rent</li> </ul> | N/A                                                                                                                                                                                                                                                                  |
| Fortnightly Income:      | \$2358.33                                                                                                                                                                                                                                                                                                                                                                                                      | \$1897.18                                                                                                                                                                                                                                                                                                                                                                                                                  | N/A                                                                                                                                                                                                                                                                  |
| Welfare only assumptions | <ul style="list-style-type: none"> <li>• Both adults are unemployed and looking for work</li> <li>• Both children attend school</li> <li>• None of the family are disabled</li> <li>• No savings or investments</li> <li>• Private rent</li> </ul>                                                                                                                                                             | <ul style="list-style-type: none"> <li>• Adult female is unemployed and looking for work</li> <li>• No child support received</li> <li>• Both children attend school</li> <li>• None of the family are disabled</li> <li>• No savings or investments</li> <li>• Private rent</li> </ul>                                                                                                                                    | <ul style="list-style-type: none"> <li>• Neither are in paid employment</li> <li>• Both receive the full age pension (maximum rate)</li> <li>• Neither are disabled or frail-aged</li> <li>• The couple has no dependent children</li> <li>• Private rent</li> </ul> |
| Fortnightly Income:      | \$1739.68                                                                                                                                                                                                                                                                                                                                                                                                      | \$1387.20                                                                                                                                                                                                                                                                                                                                                                                                                  | \$1525.40                                                                                                                                                                                                                                                            |
